# Supplementary material for: BIRC5 Inhibition Is Associated with Pyroptotic Cell Death via Caspase3-GSDME Pathway in Lung Adenocarcinoma Cells
Source: MDPI journal article supplement (doi:10.3390/ijms241914663), 2023-09-28
Supplement: s1 [file s1]

| Disease Name              | Genomic region           | Transcript   | Gene    | <i>p</i> -value | Mean Methyl Disea - mean Methyl Normal |
|---------------------------|--------------------------|--------------|---------|-----------------|----------------------------------------|
| Lung adenocarcinoma[LUAD] | chr5:148204155-148206655 | NM_000024    | ADRB2   | 1.650e-06       | 0.012                                  |
| Lung adenocarcinoma[LUAD] | chr11:67441602-67444102  | NM_000695    | ALDH3B2 | 7.678e-07       | -0.072                                 |
| Lung adenocarcinoma[LUAD] | chr7:36427411-36429911   | NM_001284301 | ANLN    | 3.156e-01       | -0.003                                 |
| Lung adenocarcinoma[LUAD] | chr17:76208276-76210776  | NM_001012270 | BIRC5   | 1.409e-04       | -0.012                                 |
| Lung adenocarcinoma[LUAD] | chr2:228676557-228679057 | NM_004591    | CCL20   | 1.413e-10       | -0.063                                 |
| Lung adenocarcinoma[LUAD] | chr5:59995493-59997993   | NM_018369    | DEPDC1B | 1.704e-01       | 0.003                                  |
| Lung adenocarcinoma[LUAD] | chr9:130608946-130611446 | NM_001278138 | ENG     | NA              | NA                                     |
| Lung adenocarcinoma[LUAD] | chr16:74808229-74810729  | NM_024306    | FA2H    | 1.393e-04       | -0.006                                 |
| Lung adenocarcinoma[LUAD] | chr11:1242294-1244794    | NM_002458    | MUC5B   | 1.626e-12       | -0.041                                 |
| Lung adenocarcinoma[LUAD] | chr17:62406583-62409083  | NM_000442    | PECAM1  | NA              | NA                                     |
| Lung adenocarcinoma[LUAD] | chr5:168727633-168730133 | NM_001271946 | SLIT3   | 1.625e-12       | 0.119                                  |
| Lung adenocarcinoma[LUAD] | chr21:43786144-43788644  | NM_003225    | TFF1    | 9.129e-12       | -0.080                                 |
| Lung adenocarcinoma[LUAD] | chr17:76182785-76185285  | NM_003258    | TK1     | 0.000e+00       | -0.041                                 |
