# Supplementary material for: BIRC5 Inhibition Is Associated with Pyroptotic Cell Death via Caspase3-GSDME Pathway in Lung Adenocarcinoma Cells
Source: MDPI journal article supplement (doi:10.3390/ijms241914663), 2023-09-28
Supplement: s1 [file s1]

| Gene        | Sequence (5'-3')                 |
|-------------|----------------------------------|
| Hsa-BIRC5   | Forward: AGGACCACCGCATCTCTACAT   |
|             | Reverse: AAGTCTGGCTCGTTCTCAGTG   |
| Hsa-CCL20   | Forward: TGCTGTACCAAGAGTTTGCTC   |
|             | Reverse: CGCACACAGACAACTTTTTCTTT |
| Hsa-MUC5B   | Forward: GCCTACGAGGACTTCAACGTC   |
|             | Reverse: CCTTGATGACAACACGGGTGA   |
| Hsa-ALDH3B2 | Forward: ATGAAGGATGAACCACGGTCC   |
|             | Reverse: CCCC GTGAAAGACAGAATTGT  |
| Hsa-TFF1    | Forward: CGCCTCTACGACCTCTCCA     |
|             | Reverse: GGTGTCGTCGAAACAGCAG     |
| Hsa-FA2H    | Forward: CGCCTCTACGACCTCTCCA     |
|             | Reverse: TGGTTCCATAGCAGGATCTGTC  |
| Hsa-ADRB2   | Forward: TTGCTGGCACCCAATAGAAGC   |
|             | Reverse: CAGACGCTCGAACTTGGCA     |
| Hsa-SLIT3   | Forward: GTCAGCGTCATCGAGAGAGG    |
|             | Reverse: TTCGGCGTGCTCTGGAAAAG    |
| Hsa-GAPDH   | Forward: GGAGCGAGATCCCTCCAAAAT   |
|             | Reverse: GGCTGTTGTCATACTTCTCATGG |
