# Supplementary material for: BIRC5 Inhibition Is Associated with Pyroptotic Cell Death via Caspase3-GSDME Pathway in Lung Adenocarcinoma Cells
Source: Int J Mol Sci. 2023 Sep 28;24(19):14663. doi: 10.3390/ijms241914663 (PMC10572361; doi:10.3390/ijms241914663)
Supplement: Supplementary file 1 [file ijms-24-14663-s001.zip]

Archive with 8 entries (8 files):
- Figure S1.pdf
- Figure S2.pdf
- Figure S3.pdf
- Figure S4.pdf
- Figures and Tables legends of supplementary.pdf
- Supplementary File S1.xlsx
- Table S1.pdf
- Table S2.pdf
