# Supplementary material for: BIRC5 Inhibition Is Associated with Pyroptotic Cell Death via Caspase3-GSDME Pathway in Lung Adenocarcinoma Cells
Source: Int J Mol Sci. 2023 Sep 28;24(19):14663. doi: 10.3390/ijms241914663 (PMC10572361; doi:10.3390/ijms241914663)
Supplement: Supplementary file 1 [file ijms-24-14663-s001.zip › Supplementary File S1.xlsx]

## Sheet: Sheet1
MCODE App Results
Parameters:
Network Scoring:
Include Loops: false Degree Cutoff: 10
Cluster Finding:
Node Score Cutoff: 0.2 Haircut: true Fluff: false K-Core: 2 Max. Depth from Seed: 100
Cluster	Score (Density*#Nodes)	Nodes	Edges	Node IDs
1	12	12	66	SCTR, PTGDR, PTGIR, LHCGR, ADRB2, GNAS, ADCY4, GNG11, RAMP3, RAMP2, CALCRL, ADRB1
2	9.455	12	52	CSF3, MCAM, ENG, TEK, ANGPT1, VWF, ITPKB, SELP, PDGFB, CDH5, PECAM1, TIE1
3	4.471	18	38	NTNG1, SLIT2, EPHA5, ITGA1, ACTN2, ROBO4, CACNA1C, CACNB2, MYL9, MYLK, CLDN5, RYR2, MYH11, KCNJ5, FLT1, SLIT3, SEMA3G, SCN4B
MCODE App Results
Parameters:
Network Scoring:
Include Loops: false Degree Cutoff: 10
Cluster Finding:
Node Score Cutoff: 0.2 Haircut: true Fluff: false K-Core: 2 Max. Depth from Seed: 100
Cluster	Score (Density*#Nodes)	Nodes	Edges	Node IDs
1	3.077	53	80	CCL20, DRD3, SLC7A11, PSMD4, TNFRSF11A, MB, CLDN17, ENPP3, CLDN8, GABRG3, MMP11, B3GNT3, RAMP1, CLDN3, CLDN4, ORM1, LCN2, CRHR1, RPE65, GCG, ELF3, MMP1, PKLR, H6PD, HSD17B2, CYP19A1, BAAT, HAO1, MUC5B, IL20RA, MUC13, PDE6G, CNGA1, MMP7, RUNX2, ALDH3B2, LIF, IL22RA2, THPO, PRLR, PRSS8, RAB25, PPP1R1B, FABP7, TFF1, GREB1, S100B, GFAP, FA2H, CEACAM6, MGST1, CP, MEPE
2	3	5	6	TK1, DEPDC1B, RNASEH2A, ANLN, BIRC5
