# Supplementary figures and images for: BIRC5 Inhibition Is Associated with Pyroptotic Cell Death via Caspase3-GSDME Pathway in Lung Adenocarcinoma Cells
Source: MDPI journal article supplement (doi:10.3390/ijms241914663), 2023-09-28

# KEGG enrichment analysis

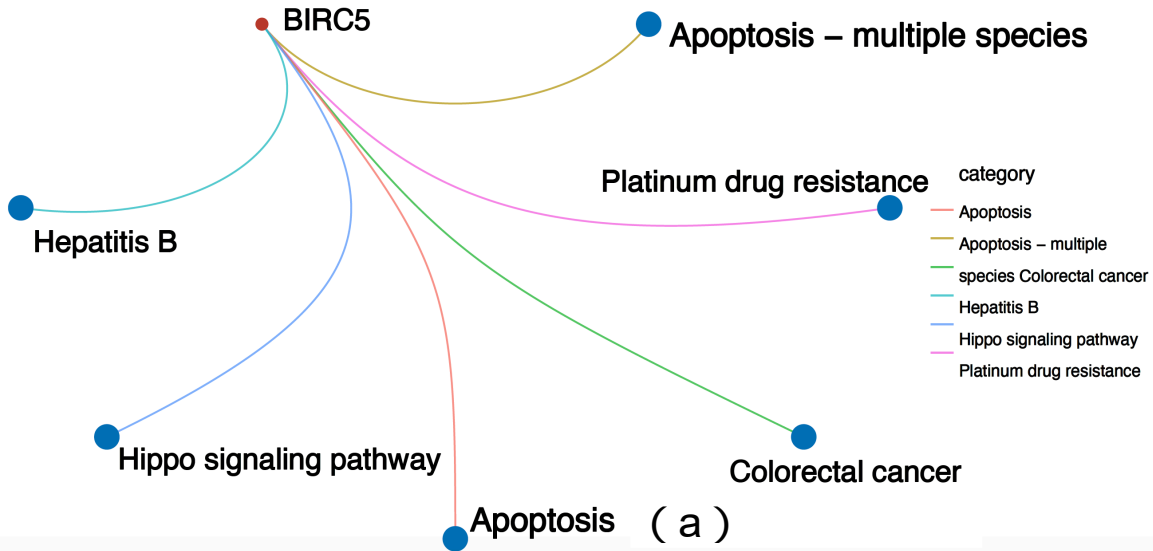

Supplement: s1 [file s1]

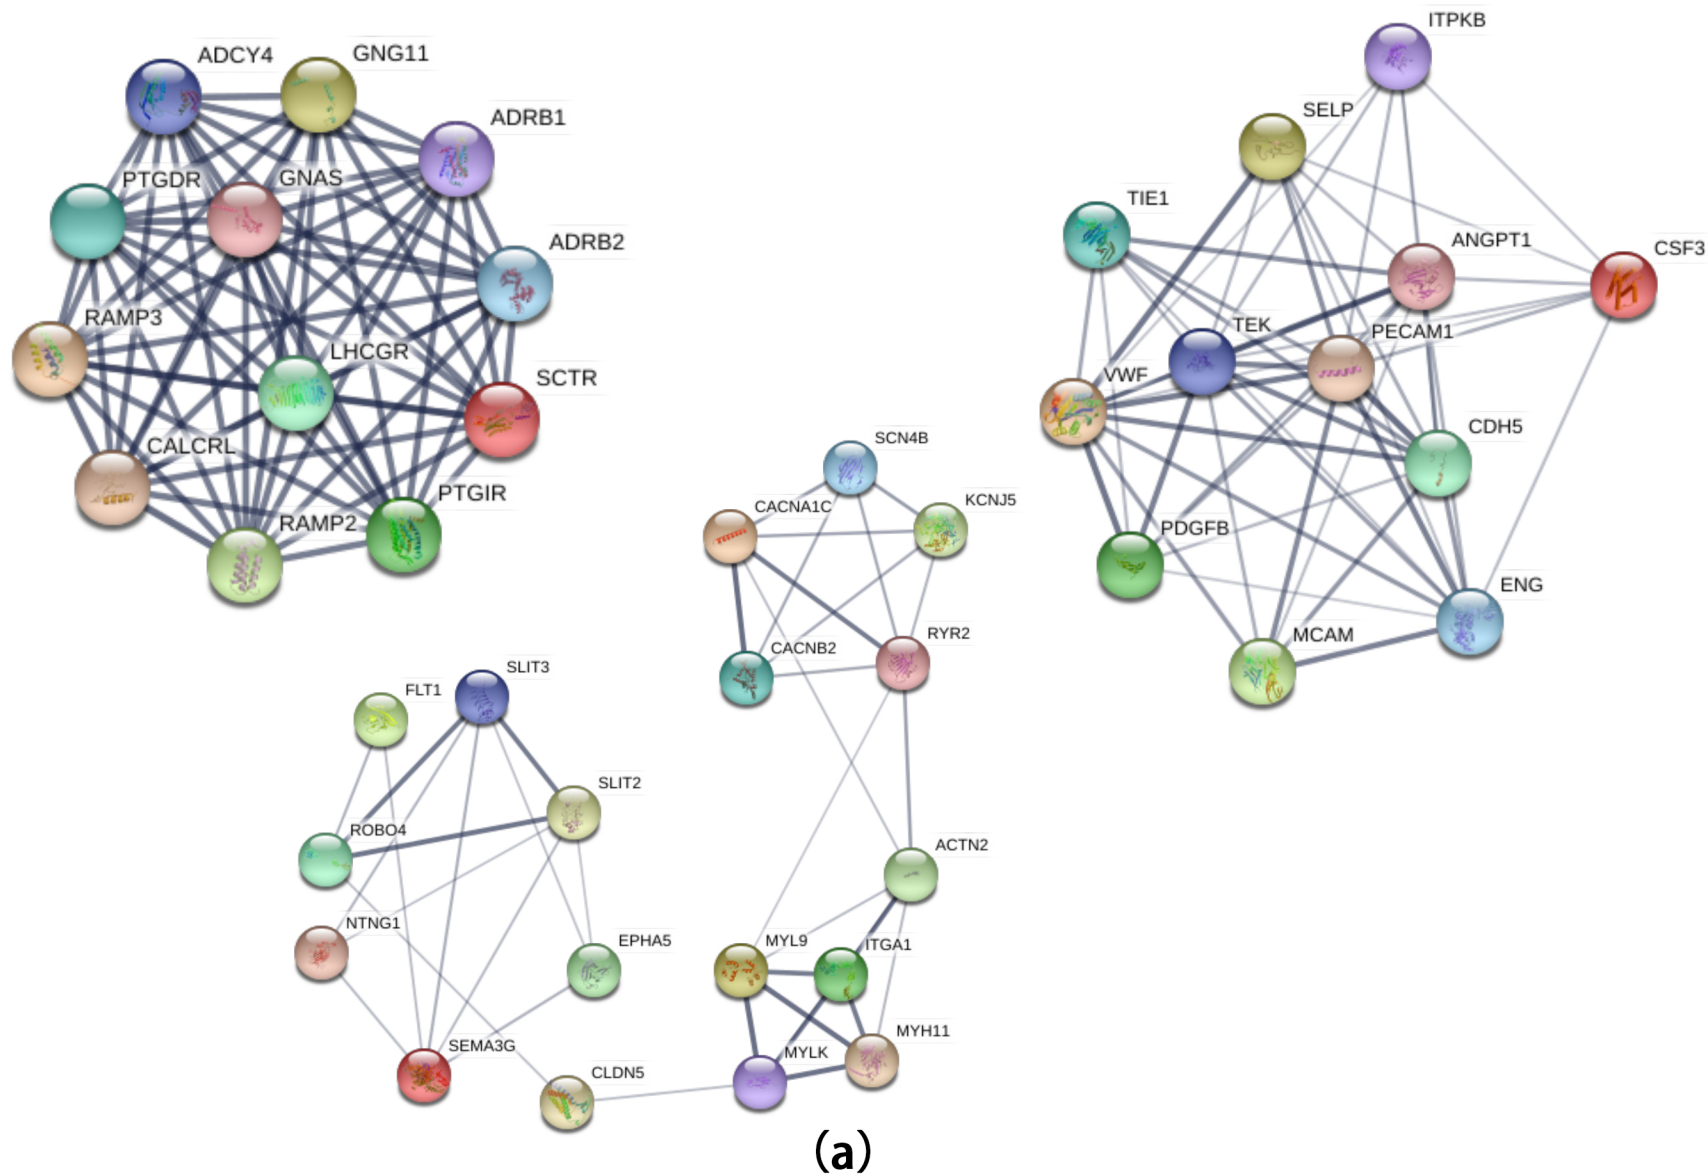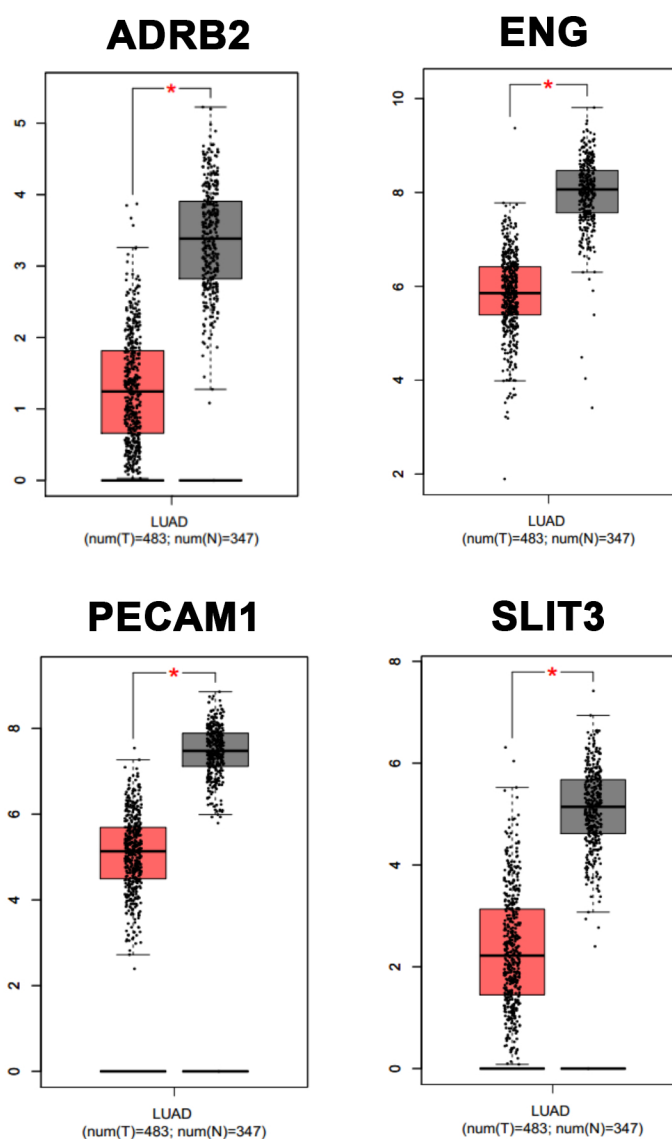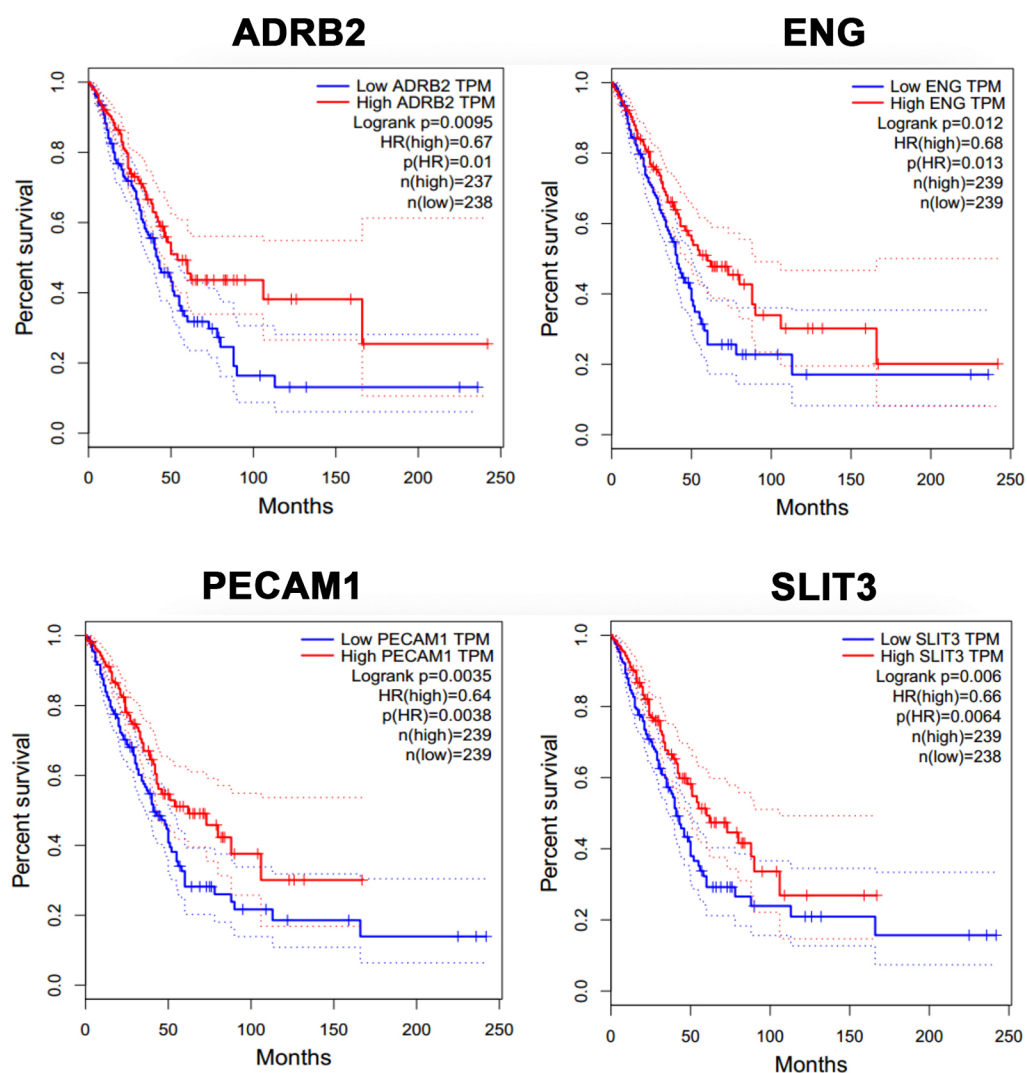

■ Tumor ■ Normal

Supplement: s1 [file s1]

**CCL20**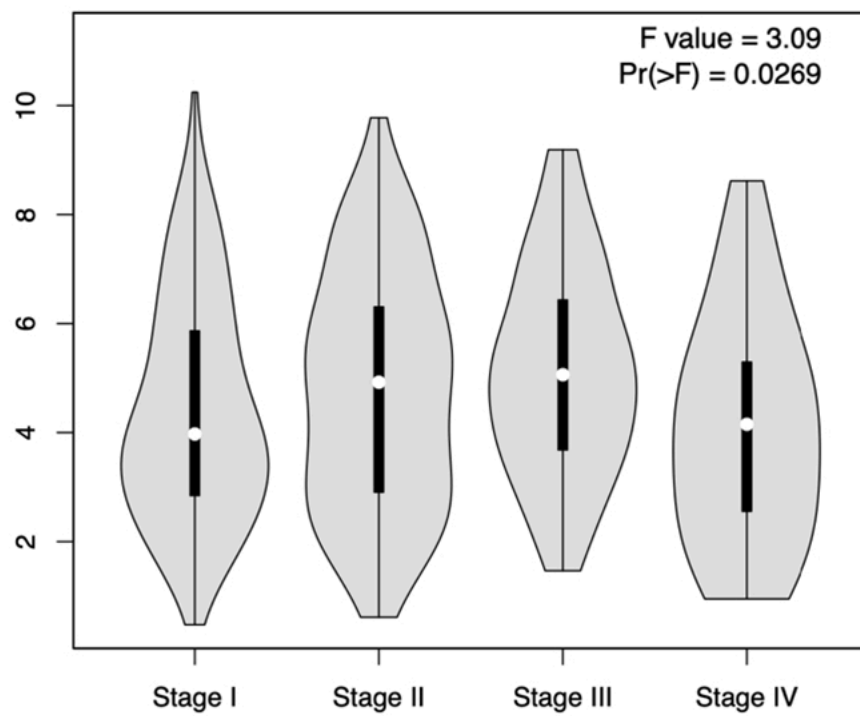**(a)****MUC5B**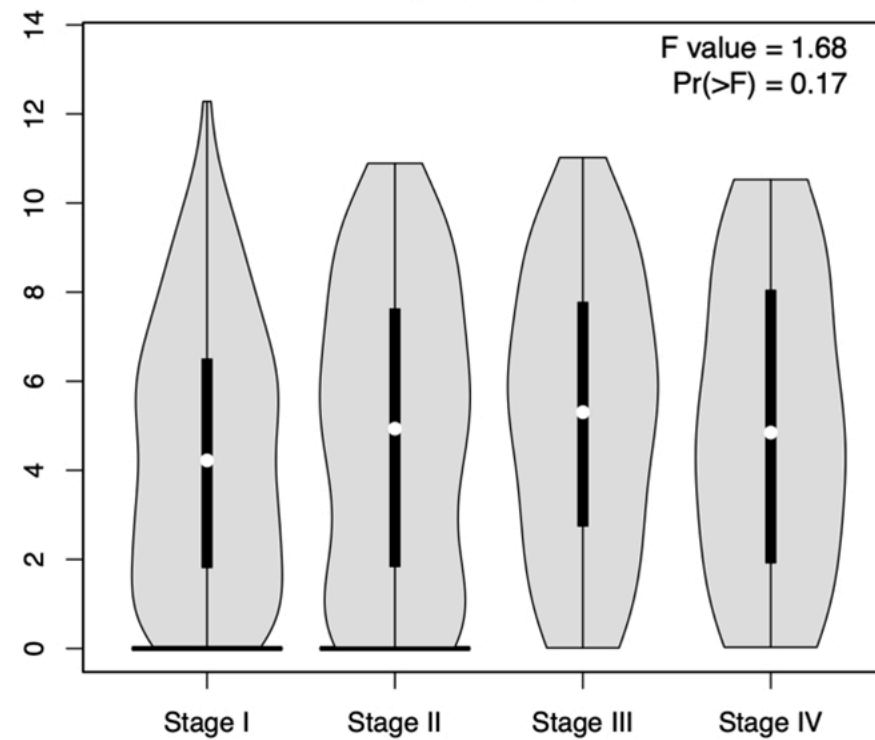**(b)****BIRC5**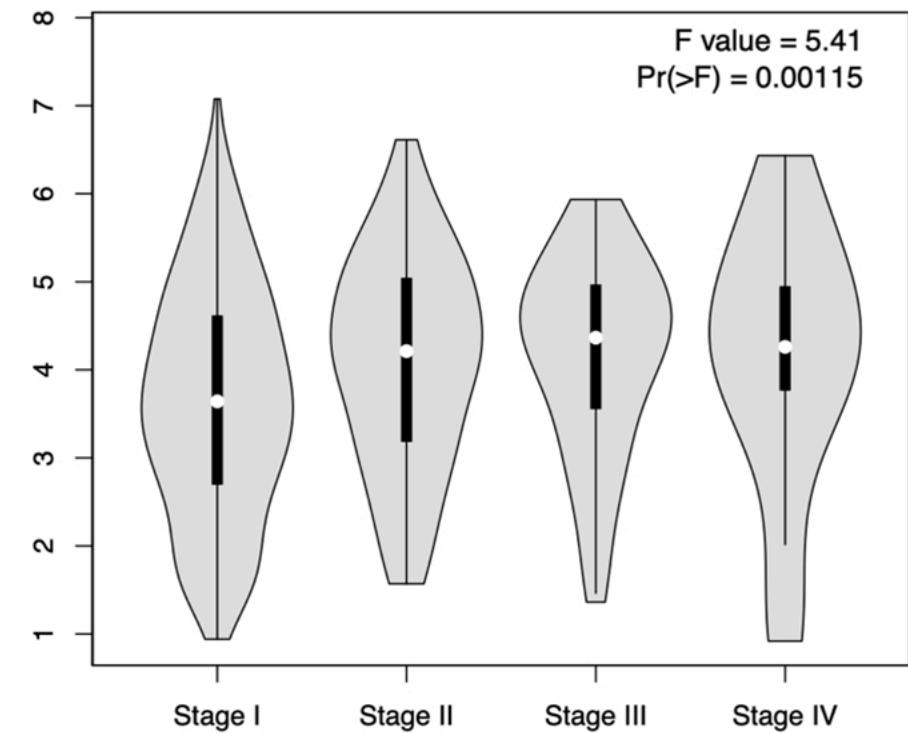**(c)****ADRB2**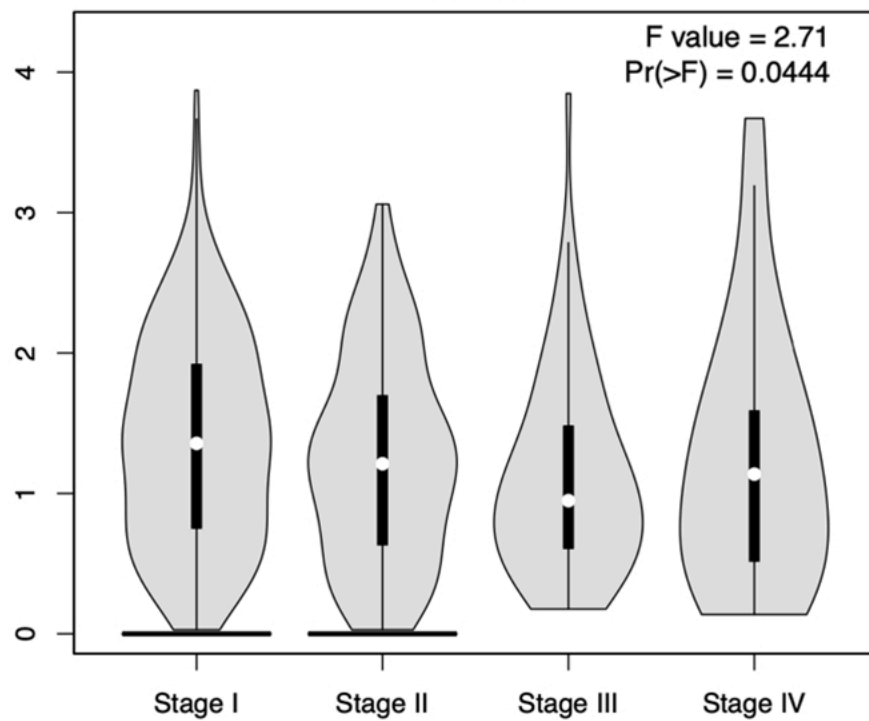**(d)****SLIT3**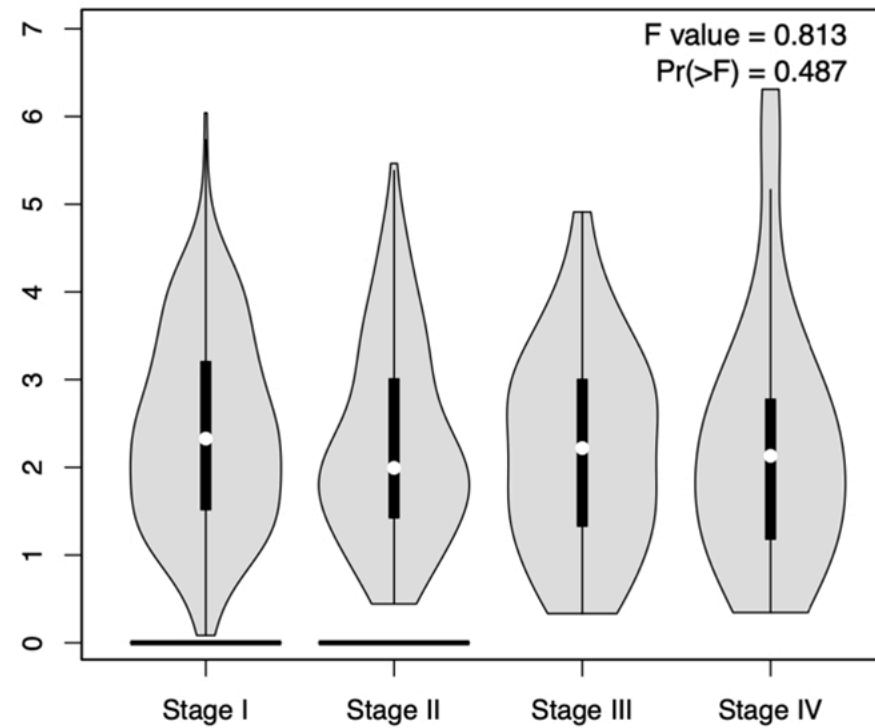**(e)**

Supplement: s1 [file s1]

## Upregulated- hypomethylation

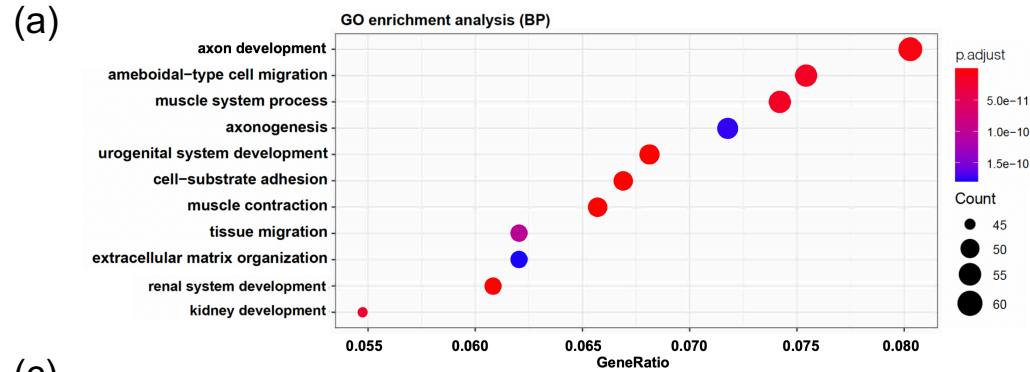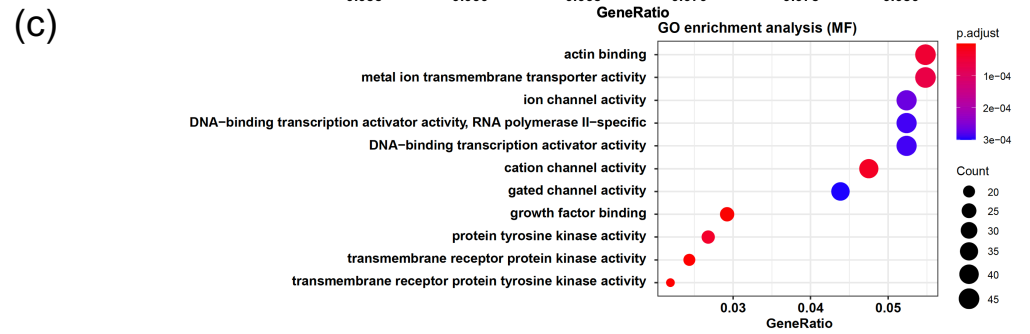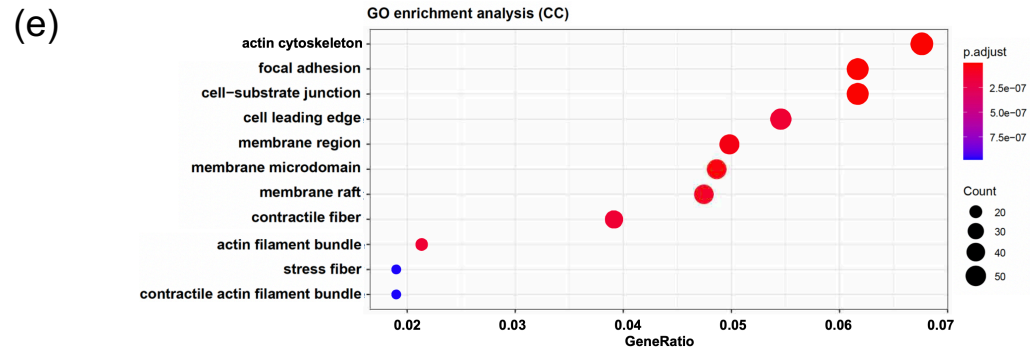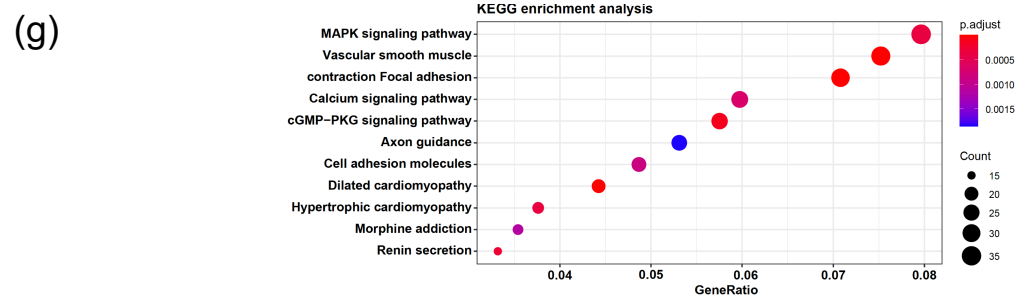

## Downregulated-hypermethylation

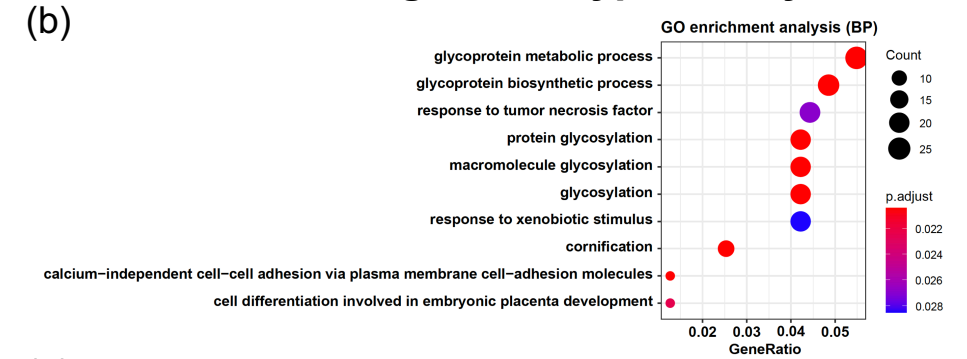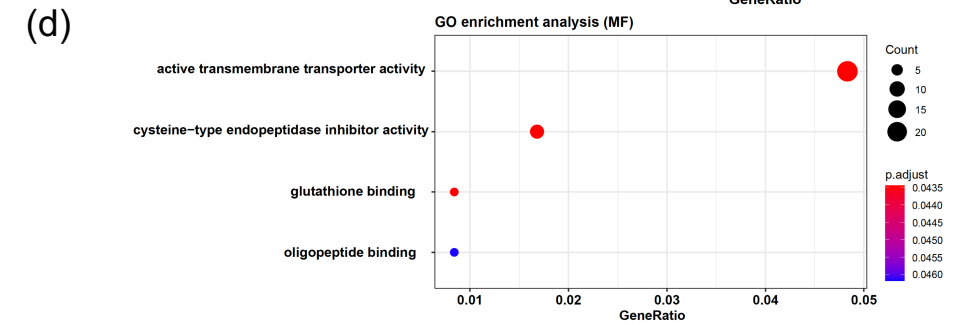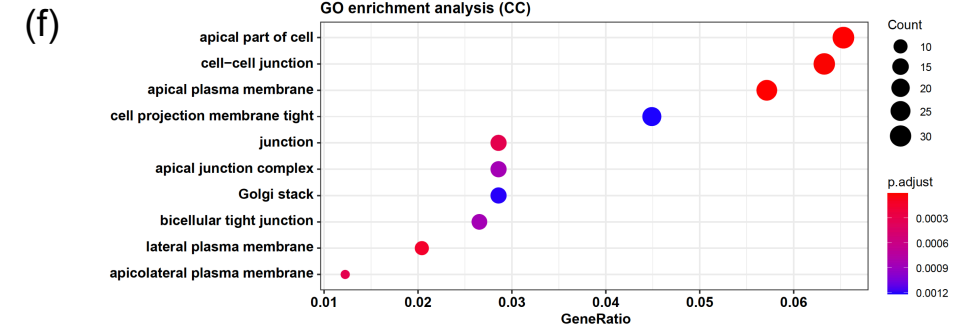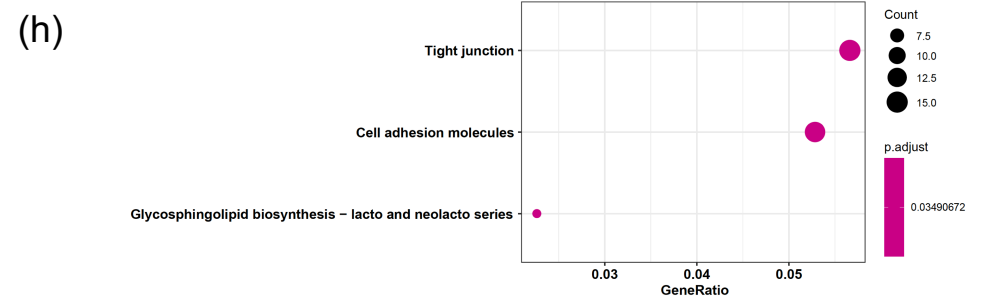

Supplement: s1 [file s1]
